# Supplementary material for: Artificial Liver Support with CytoSorb and MARS in Liver Failure: A Retrospective Propensity Matched Analysis
Source: MDPI journal article supplement (doi:10.3390/jcm12062258), 2023-03-14
Supplement: s1 [file s1]

Supplementary Table S1. Comparison on clinical and paraclinical data and severity scores at ICU admission and ICU discharge.

|                           | CytoSorb group      |                     |            | MARS group          |                     |            | P<br>between<br>groups |
|---------------------------|---------------------|---------------------|------------|---------------------|---------------------|------------|------------------------|
|                           | ICU<br>admission    | ICU<br>discharge    | P<br>value | ICU<br>admission    | ICU<br>discharge    | P<br>value |                        |
| Lactate<br>( $\mu$ mol/L) | 2.9 [1.2,<br>7.8]   | 3.1 [0.7,<br>9.2]   | 0.95       | 2.4 [1.1,<br>8.2]   | 8.9 [1.2,<br>25.0]  | 0.02       | 0.01                   |
| Creatinine<br>(mg/dL)     | 0.8 [0.2,<br>6.0]   | 1.3 [0.5,<br>4.9]   | 0.44       | 0.6 [0.1,<br>2.4]   | 1.4 [0.3,<br>6.2]   | 0.01       | 0.23                   |
| BUN (mg/dL)               | 60 [3,<br>276]      | 57 [9,<br>294]      | 0.91       | 30 [8,<br>132]      | 31 [11,<br>184]     | 0.76       | 0.50                   |
| Bilirubin<br>(mg/dL)      | 19.4 [4.0,<br>33.8] | 10.1 [0.6,<br>33.8] | 0.14       | 25.3 [3.2,<br>51.0] | 11.6 [0.7,<br>42.6] | 0.11       | 0.54                   |
| Sodium<br>(mmol/L)        | 138 [119,<br>141]   | 137 [123,<br>147]   | 0.58       | 137 [126,<br>143]   | 138 [131,<br>141]   | 0.23       | 0.74                   |
| INR                       | 2.7 [1.5,<br>11.2]  | 2.0 [1.0,<br>5.6]   | 0.07       | 2.6 [1.6,<br>5.7]   | 2.3 [1.1,<br>17.3]  | 0.54       | 0.18                   |
| Albumin<br>(g/dL)         | 2.7 [1.7,<br>3.7]   | 3.2 [1.8,<br>4.2]   | 0.17       | 3.2 [2.2,<br>4.4]   | 2.9 [1.9,<br>5.4]   | 0.57       | 0.33                   |
| AST (U/L)                 | 98 [46,<br>8219]    | 65 [23,<br>1164]    | 0.12       | 249 [50,<br>8219]   | 103 [23,<br>312]    | 0.01       | 0.56                   |
| ALT (U/L)                 | 257 [31,<br>8332]   | 73 [9,<br>832]      | 0.04       | 257 [7,<br>7550]    | 89 [18,<br>552]     | 0.05       | 0.71                   |
| GGT (U/L)                 | 63 [28,<br>489]     | 88 [15,<br>774]     | 0.85       | 70 [16,<br>512]     | 29 [14,<br>99]      | 0.01       | 0.31                   |

|                                      |                      |                      |      |                     |                    |      |      |
|--------------------------------------|----------------------|----------------------|------|---------------------|--------------------|------|------|
| Ammonia<br>( $\mu\text{mol/L/}$ )    | 69 [26,<br>147]      | 39 [2,<br>168]       | 0.16 | 29 [15,<br>110]     | 93 [21,<br>123]    | 0.10 | 0.03 |
| LDH (U/L)                            | 418 [290,<br>1832]   | 273 [104,<br>1817]   | 0.05 | 302 [132,<br>3679]  | 313 [163,<br>555]  | 0.97 | 0.35 |
| Haemoglobin<br>(g/dL)                | 10.6 [6.7,<br>15.6]  | 7.8 [6.9,<br>10.6]   | 0.02 | 10.8 [5.7,<br>15.2] | 7.5 [6.0,<br>10.5] | 0.01 | 0.77 |
| WBC<br>(* $10^3/\mu\text{L}$ )       | 13.6 [6.8,<br>34.9]  | 11.9 [1.9,<br>23.1]  | 0.57 | 10.6 [2.8,<br>18.2] | 8.7 [0.6,<br>81.6] | 0.94 | 0.18 |
| Platelets<br>(* $10^3/\mu\text{L}$ ) | 111 [43,<br>303]     | 37 [20,<br>244]      | 0.02 | 107 [28,<br>262]    | 42 [6.0,<br>397]   | 0.01 | 0.26 |
| PCT (ng/mL)                          | 0.9 [0.1,<br>5.8]    | 0.5 [0.1,<br>13.9]   | 0.39 | 1.0 [0.1,<br>2.5]   | 0.8 [0.2,<br>2.1]  | 0.72 | 0.54 |
| PCR (mg/L)                           | 12.0 [0.5,<br>137.0] | 32.0 [1.9,<br>115.0] | 0.05 | 15.2 [2.5,<br>51.8] | 29 [2.7,<br>56.0]  | 0.58 | 0.03 |
| Fibrinogen<br>(mg/dL)                | 145 [83,<br>387]     | 157 [50,<br>382]     | 0.95 | 128 [77,<br>286]    | 124 [27,<br>409]   | 0.40 | 0.58 |
| SOFA Score                           | 9 [5, 13]            | 13 [1, 21]           | 0.20 | 7 [4, 14]           | 14 [1, 22]         | 0.03 | 0.93 |
| SOFA CV                              | 0 [0, 1]             | 4 [0, 4]             | 0.01 | 0 [0, 3]            | 2 [0, 4]           | 0.02 | 0.79 |
| SOFA Resp                            | 1 [0, 3]             | 2 [0, 3]             | 0.82 | 2 [0, 3]            | 2 [0, 4]           | 0.65 | 0.73 |
| SOFA Coag                            | 1 [0, 3]             | 3 [0, 3]             | 0.01 | 1 [0, 3]            | 3 [0, 4]           | 0.03 | 0.76 |
| SOFA Liver                           | 4 [2, 4]             | 3 [0, 4]             | 0.12 | 4 [2, 4]            | 4 [0, 4]           | 0.25 | 0.92 |
| SOFA Renal                           | 0 [0, 4]             | 3 [0, 4]             | 0.02 | 0 [0, 3]            | 1 [0, 4]           | 0.03 | 0.30 |
| SOFA CNS                             | 1 [1, 4]             | 2 [0, 4]             | 0.84 | 0 [0, 4]            | 4 [0, 4]           | 0.08 | 0.23 |

|              |              |              |      |              |               |      |      |
|--------------|--------------|--------------|------|--------------|---------------|------|------|
| MELD Score   | 34 [24, 40]  | 36 [6, 40]   | 0.80 | 32 [18, 40]  | 29 [9, 40]    | 0.80 | 0.50 |
| GCS (points) | 13 [3, 14]   | 13 [3, 15]   | 0.13 | 15 [3, 15]   | 13 [3, 15]    | 0.11 | 0.86 |
| MAP (mmHg)   | 72 [68, 98]  | 70 [65, 91]  | 0.96 | 90 [69, 122] | 78 [60, 96]   | 0.01 | 0.01 |
| HR (bpm)     | 83 [65, 125] | 90 [63, 133] | 0.87 | 83 [56, 116] | 104 [48, 114] | 0.20 | 0.47 |

Legend. Data are presented as median [min, max]. BUN, urea; INR, International Normalized Ratio; AST, aspartate aminotransferase; ALT, alanine aminotransferase; GGT, gamma-glutamyl transferase; LDH, lactate dehydrogenase; WBC, white blood cell count; CRP, C-reactive protein; PCT, procalcitonin, SOFA, Sequential Organ Failure Assessment; CV, cardiovascular; Resp, respiratory; Coag, coagulation; CNS, Central Nervous System; GCS, Glasgow Coma Scale; MAP, mean arterial pressure; HR, heart rate
